# Supplementary material
Source: publisher figshare collection journal article supplement (https://acs.figshare.com/ndownloader/files/4350664)
Supplement: Supplementary file 1 [file 4350664]

## Supporting Information

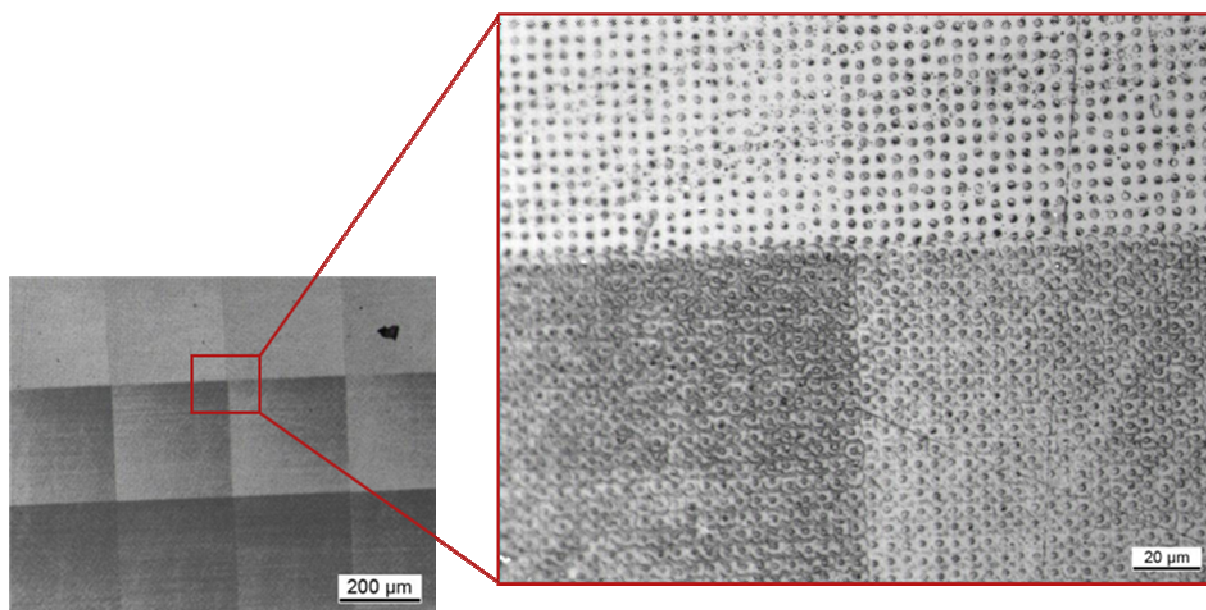

**SI-1.** Image by ESEM of the junction between four matrices.

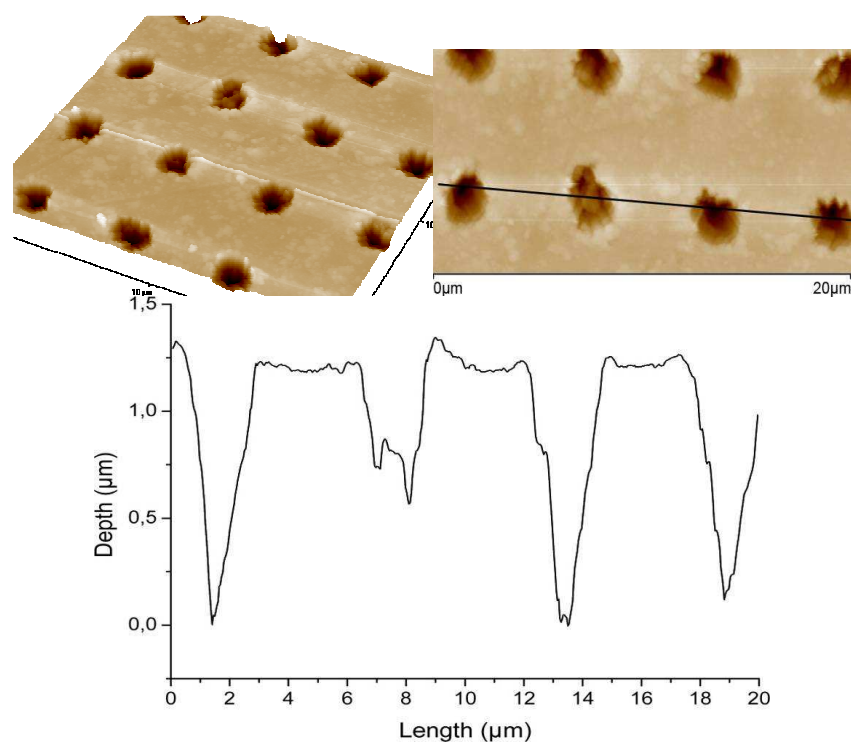

**SI-2.** AFM image and profile of the master mold B with holes of 1 micron depth.

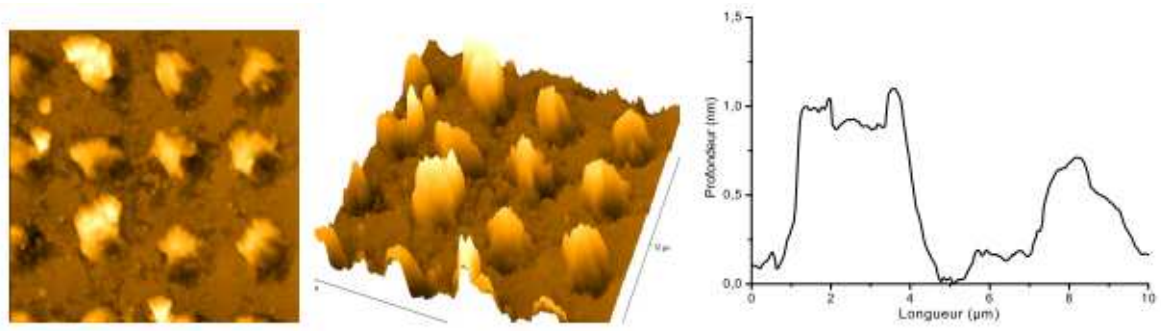

**SI-3.** AFM image of the PMMA imprint with pillars of 1micron height.

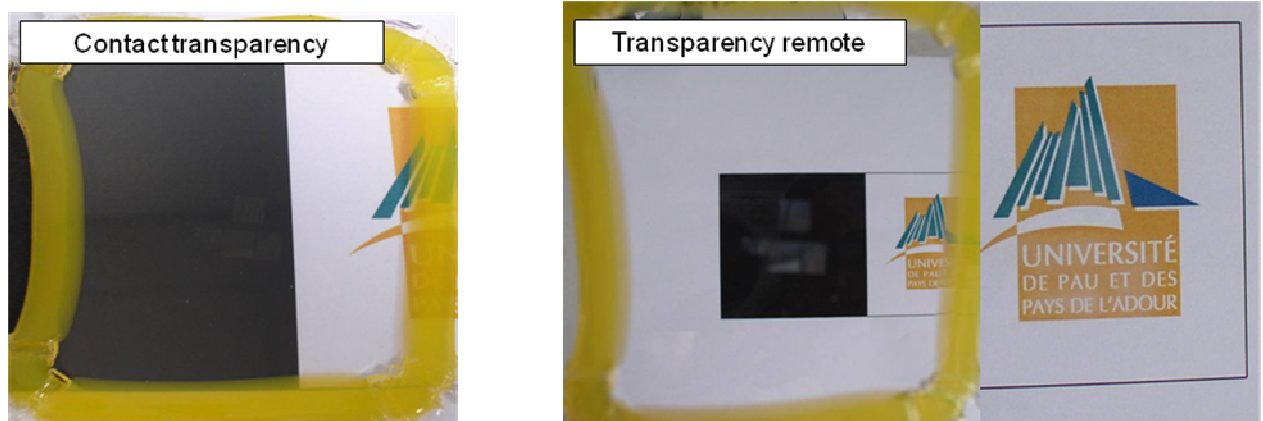

**SI-4.** Photographs of the transparency on dark and bright substrates at different distances.

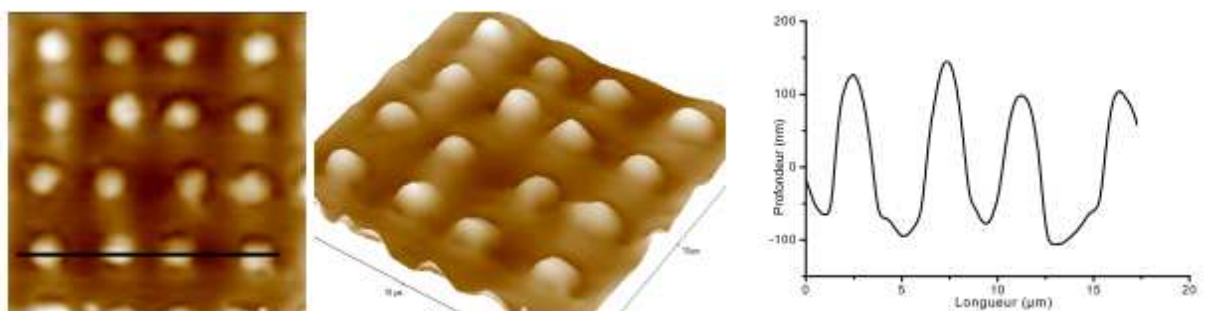

**SI-5.** AFM image and profile of the fourth replica obtained without cleaning from master mold A.
